# Supplementary material for: Diet-induced phenotypic plasticity in European eel (Anguilla anguilla)
Source: Oxford University Press journal article supplement (doi:10.1242/jeb.131714), 2016-02-01
Supplement: jeb131714supp.pdf [file jeb131714supp.pdf]

**Table S1:** Table showing the mean  $\pm$  stdev of the water quality measurements (N = 24) of each aquarium.

|                | <b>NO<sub>3</sub><sup>-</sup> (mg/l)</b> | <b>NO<sub>2</sub><sup>-</sup> (mg/l)</b> | <b>Hardness (mg/l)</b> | <b>pH</b>     | <b>Cl<sub>2</sub> (mg/l)</b> | <b>T (°C)</b>  |
|----------------|------------------------------------------|------------------------------------------|------------------------|---------------|------------------------------|----------------|
| <b>Hard</b>    | 12,5 $\pm$ 7,5                           | 0,04 $\pm$ 0,21                          | 120                    | 7,4 $\pm$ 0,2 | 0                            | 22,3 $\pm$ 1,0 |
| <b>Soft</b>    | 11,9 $\pm$ 9,3                           | 0                                        | 120                    | 7,5 $\pm$ 0,2 | 0                            | 22,7 $\pm$ 1,1 |
| <b>Control</b> | 13,1 $\pm$ 9,4                           | 0                                        | 120                    | 7,5 $\pm$ 0,3 | 0                            | 22,3 $\pm$ 1,0 |

**Table S2: Table showing the composition, size (mean length X mean width; N = 20) and the portion given on a weekly basis of each prey item. To the control group, half of the portion of both diets was given.**

|                        | hard diet       |                    |                    |          | soft diet         |                   |                   |                    | All diets  |
|------------------------|-----------------|--------------------|--------------------|----------|-------------------|-------------------|-------------------|--------------------|------------|
|                        | <i>Mysis</i> sp | <i>E. pacifica</i> | <i>Gammarus</i> sp | Cockle   | <i>Glycera</i> sp | <i>Tubifex</i> sp | Chironomid larvae | <i>Cyclops</i> sp. | Meal worms |
| Protein (min. %)       | 5               | 5                  | 5,1                | 4,6      | 4,9               | 5,4               | 5                 | 5,1                | 53         |
| Fat (min. %)           | 1               | 1,2                | 1,2                | 1,2      | 0,7               | 1                 | 1                 | 1                  | 28         |
| Carbohydrates (min. %) | 0,9             | 0,8                | 0,9                | 1,2      | 0,4               | 0,6               | 0,9               | 0,9                | 6          |
| Moisture (max. %)      | 92,3            | 92,2               | 92                 | 92,2     | 93,1              | 92,2              | 92                | 92                 | 5          |
| Ash (max. %)           | 0,8             | 0,8                | 0,8                | 0,8      | 0,9               | 0,8               | 0,8               | 0,8                | 8          |
| Size (mm)              | 4,4X1,3         | 8,5X1,9            | 5,9X3,0            | 16,5X8,3 | 10,5X1,2          | 25,3X0,6          | 5,9X1,1           | - **               | 5,0X5,0    |
| Portion (g)            | 17,5 (7)*       | 10,5               | 7                  | 3,5      | 17,5 (10,5)*      | 7                 | 5                 | 7                  | 5          |

\* Number in parentheses represents the portion given two months after the start of the experiment

\*\* *Cyclops* too small to measure
